# Supplementary material for: Structure and evolution of the Fam20 kinases
Source: PubMed Central journal article supplement (PMC5865150; doi:10.1038/s41467-018-03615-z), 2018-03-23
Supplement: 41467_2018_3615_MOESM1_ESM.pdf [file 41467_2018_3615_MOESM1_ESM.pdf]

**Supplementary Information for**

**Structure and evolution of the Fam20 kinases**

Zhang et al.

**This file includes:**

Supplementary Figures 1-8

Supplementary Tables 1-2

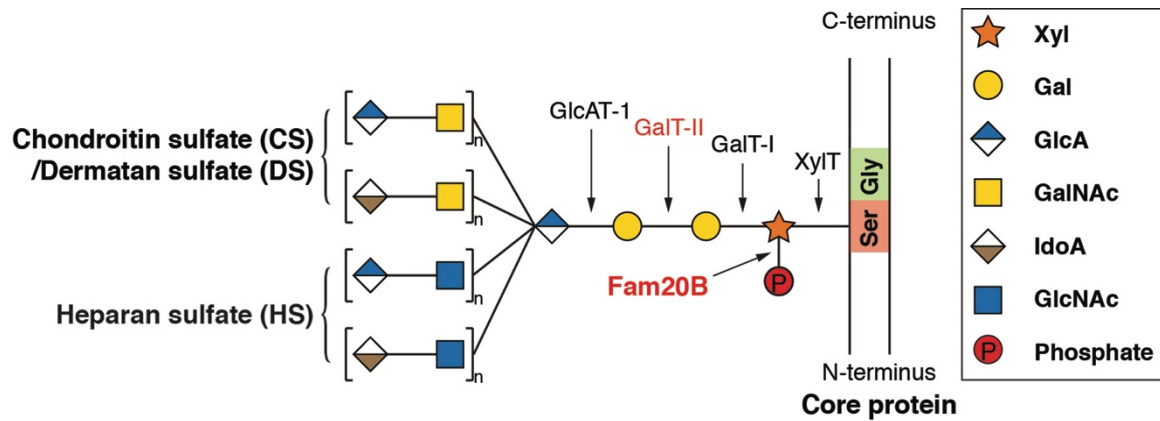

**Supplementary Figure 1. A schematic of proteoglycan structures and enzymes involved in the biosynthesis of the tetrasaccharide linkage.**

The biosynthesis of CS/DS and HS proteoglycans requires the formation of a tetrasaccharide linker, established by the sequential actions of xylosyltransferase (XylT), galactosyltransferase I (GalT-I), galactosyltransferase II (GalT-II), and glucuronyltransferase I (GlcAT-I). During this process, Fam20B recognizes the Gal-Xyl disaccharide and phosphorylates the Xyl at the C2 hydroxyl position, which is important for priming the activity of GalT-II.



*Hydra magnipapillata* Fam20 (hmFam20) and the corresponding residues in human Fam20B (hsFam20B) are shown in a magenta background. Dimer interface residues in *Caenorhabditis elegans* Fam20 (ceFam20) are shown in a yellow background. Dimer interface residues in *Danio Rerio* Fam20C (drFam20C) and the corresponding residues in human Fam20C (hsFam20C) are shown in an orange background. Fam20C-binding residues in human Fam20A (hsFam20A) and the corresponding residues in drFam20A are shown in a cyan background. The N $\alpha$ 2 helix in drFam20C that is critical for tetramer formation and the corresponding region in hsFam20C are highlighted using a green box. Secondary structures of hsFam20A are shown below the sequence blocks (N: N-terminal segment, K: Kinase domain).

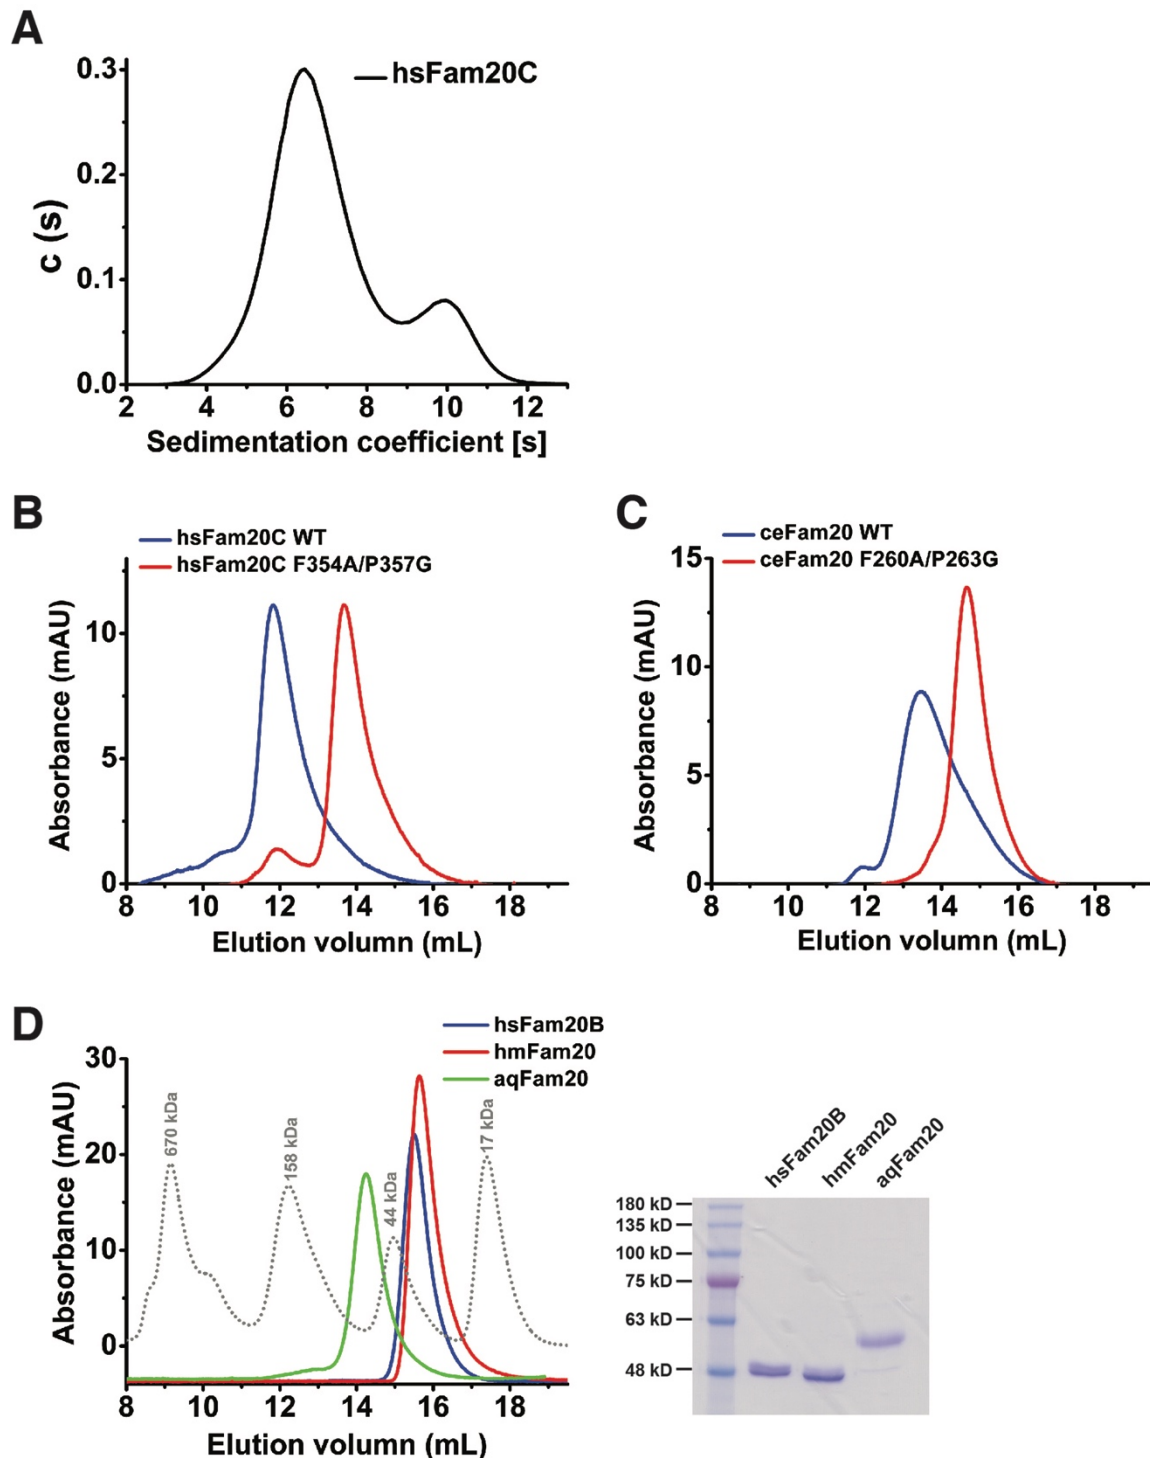

**Supplementary Figure 3. The Fam20C proteins are evolutionarily conserved as dimers, while the Fam20B proteins are monomers.**

(A) Sedimentation velocity analytical ultracentrifugation suggests that Fam20C is predominantly a dimer in solution at 1 mg/ml, with a sedimentation coefficient of 6.5 S.

(B) In contrast to WT Fam20, Fam20C-F354A/P357G is largely monomeric as evaluated by size exclusion chromatography.

(C) ceFam20 is a dimer in solution, while a F260A/P263G mutant is a monomer.

(D) The Fam20B proteins are monomers in solution. aqFam20 (388 amino acids, see Methods) is slightly larger than hmFam20 (361 amino acids) and human Fam20B (348 amino acids), as shown by the SDS-PAGE on the right (all three proteins contain two N-linked glycosylation sites, so they migrate more slowly compared to normal proteins on the gel). Nevertheless, aqFam20 is still a monomer as judged by the elution positions of the size exclusion molecular weight standards.



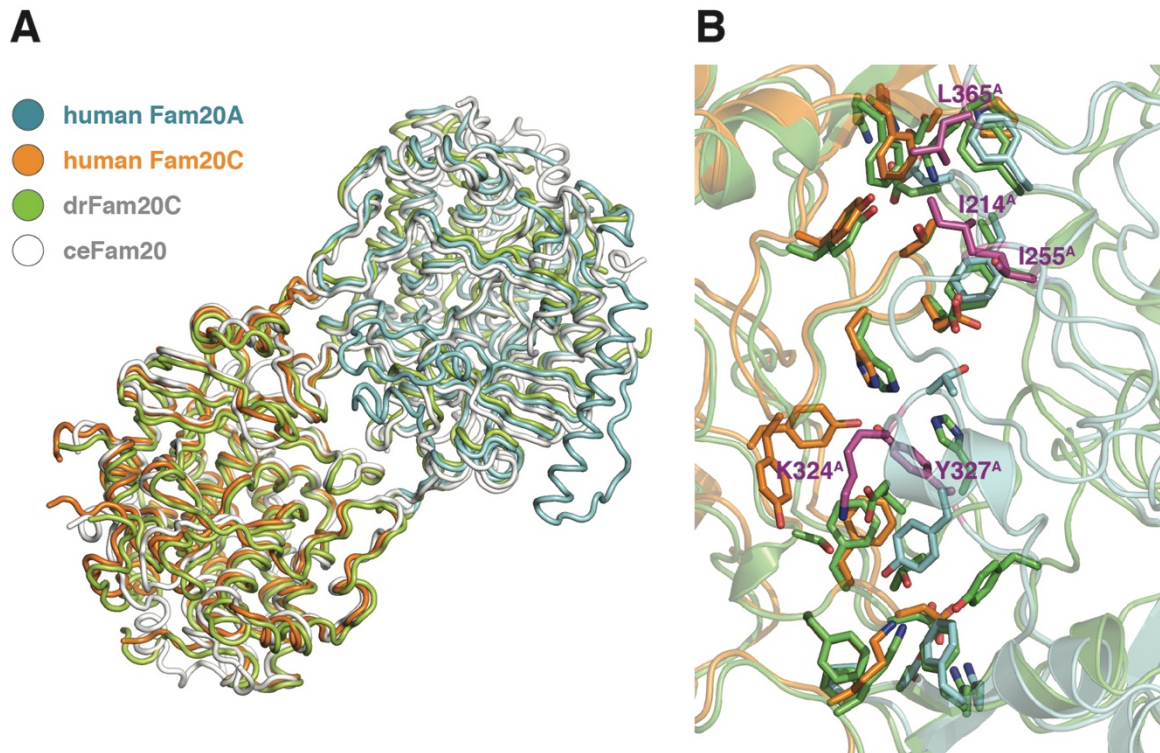

**Supplementary Figure 4. Comparison of the Fam20A-Fam20C heterodimer, the drFam20C homodimer, and the ceFam20 homodimer.**

**(A)** drFam20C and ceFam20 homodimers are superimposed on the Fam20A-Fam20C heterodimer. Fam20A is shown in cyan, Fam20C is shown in orange. The drFam20C and ceFam20 molecules are shown in green and white, respectively.

**(B)** Comparison of the Fam20A-Fam20C heterodimer interface and the drFam20C homodimer interface. The color scheme is the same as **(A)**. Ile214<sup>A</sup>, Ile255<sup>A</sup>, Leu365<sup>A</sup>, Lys324<sup>A</sup>, and Tyr327<sup>A</sup> that are unique to Fam20A are highlighted in magenta.

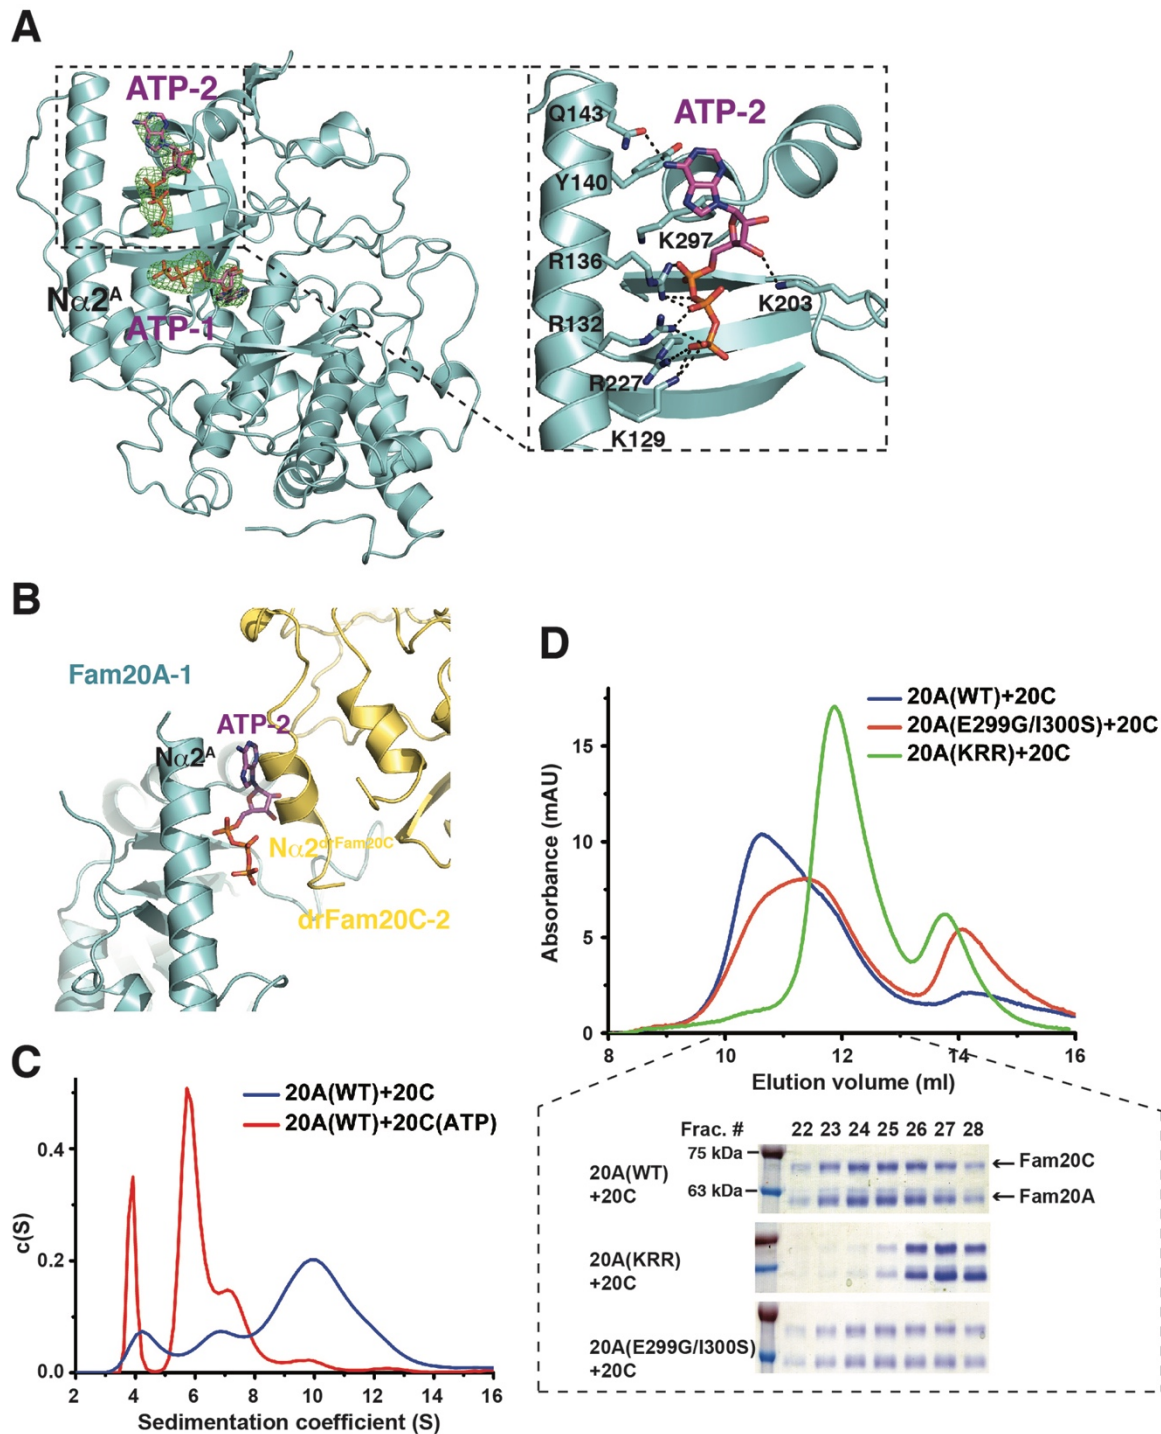

**Supplementary Figure 5. Fam20A can bind a second ATP molecule, which can convert the human Fam20A-Fam20C tetramer to a dimer.**

(A) Two ATP molecules (ATP-1 and ATP-2) are bound to Fam20A in the human Fam20A-Fam20C crystal structure. Green meshes represent the  $F_o-F_c$  difference electron density map (contoured at  $3.0 \sigma$ ) calculated before the ATP molecules were modeled. Residues in Fam20A involved in binding to ATP-2 are depicted in an enlarged image shown on the right.

(B) ATP-2 would collide with the  $N\alpha 2^{drFam20C}$  helix in drFam20C-2 when the human Fam20A-Fam20C dimer is superimposed onto Fam20A-1-drFam20C-1 in the Fam20A-drFam20C tetramer, and therefore prevents tetramer formation. Only ATP-2 from the human Fam20A-Fam20C dimer, and Fam20A-1, drFam20C-2 from the Fam20A-drFam20C tetramer are shown for clarity.

(C) Sedimentation velocity analytical ultracentrifugation experiments suggest that the human Fam20A-Fam20C complex can form a homogeneous tetramer at  $4 \mu\text{M}$  (with a sedimentation coefficient of 10 S). The presence of 1 mM ATP almost completely shifts the Fam20A-Fam20C complex to a dimer.

**(D)** The elution profiles of different Fam20A-Fam20C complexes from size exclusion chromatography. WT or mutant Fam20A were incubated with Fam20C at a molar ratio of ~1.2:1 and then passed through a Superdex 200 increase column. The running buffer contained 20 mM HEPES, pH 7.5, 100 mM NaCl. Fractions 22-28 correspond to elution volumes 10.0-12.8 ml (0.4 ml per fraction). Excess Fam20A monomer elutes at ~14 ml. KRR: K129A/R132A/R136A.



**Fam20A-Fam20C**

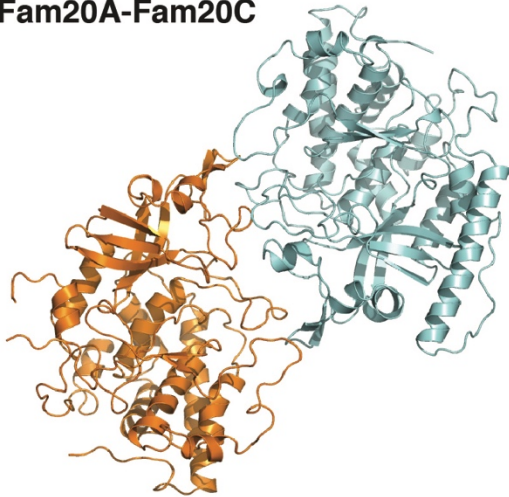

**PKR**

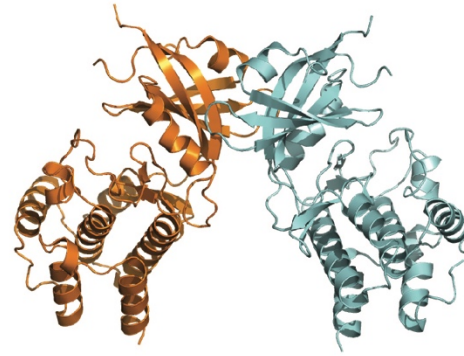

**BRAF**

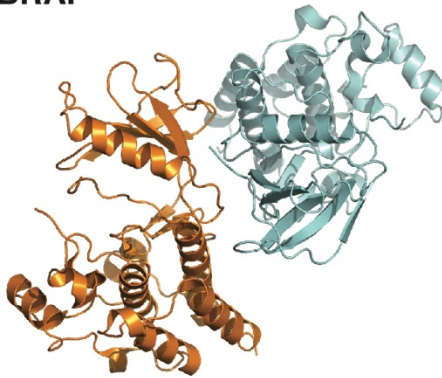

**EGFR**

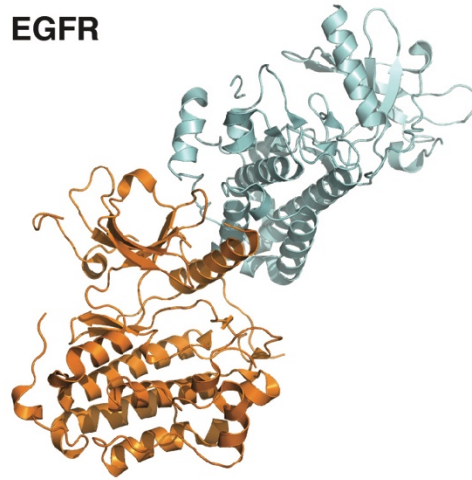

**Supplementary Figure 6. The Fam20A-Fam20C, PKR, RAF, and EGFR kinases form diverse homo/heterodimers that lead to kinase activation.**

Fam20C forms a reversed face-to-face homodimer or heterodimer with Fam20A. PKR and other eIF2 $\alpha$  kinases form back-to-back dimers (illustrated by the structure of PKR, PDB ID 2A1A [<http://dx.doi.org/10.2210/pdb2A1A/pdb>]). The RAF family kinases form side-to-side dimers (illustrated by the structure of BRAF, PDB ID 1UWH [<http://dx.doi.org/10.2210/pdb1UWH/pdb>]). The EGFR family kinases form asymmetric head-to-tail dimers (illustrated by the structure of EGFR, PDB ID 2GS6 [<http://dx.doi.org/10.2210/pdb2GS6/pdb>]).

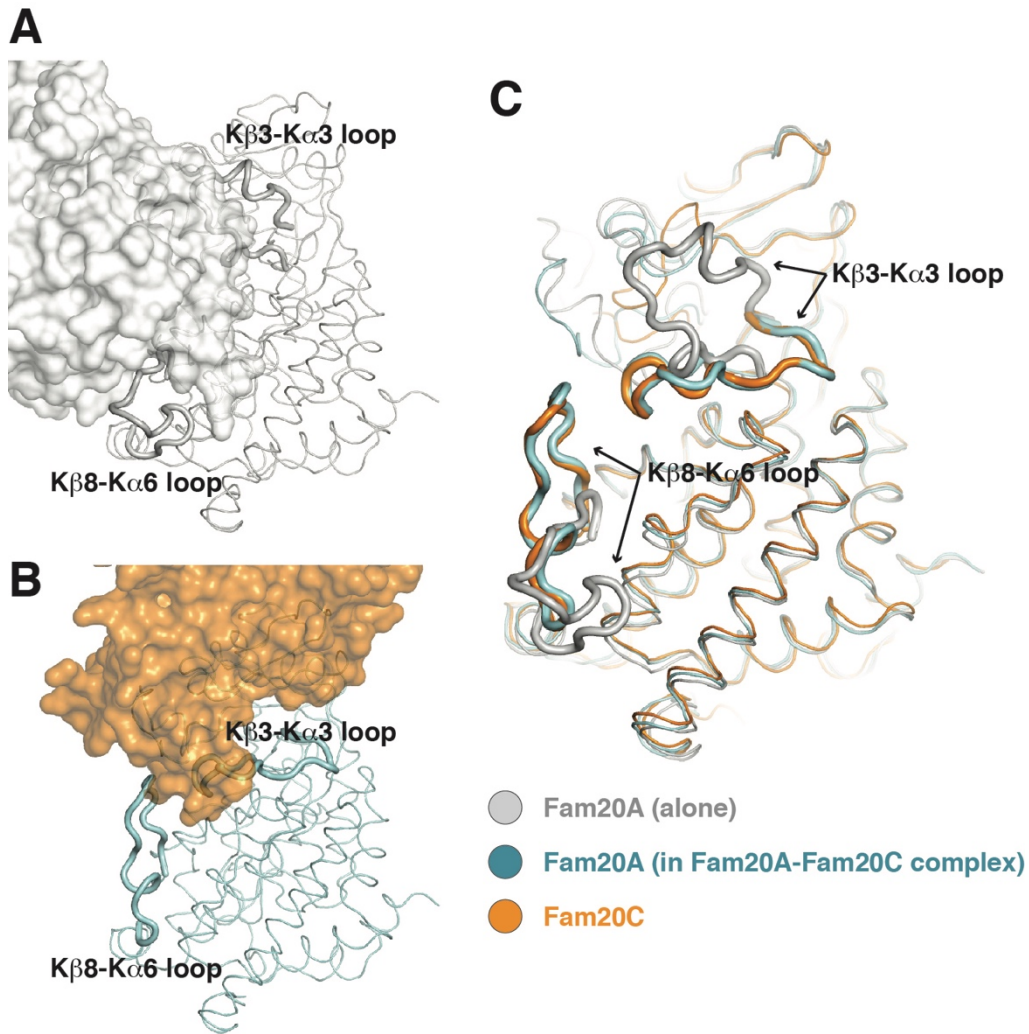

**Supplementary Figure 7. Two loops in Fam20A undergo large conformational changes when Fam20A complexes with Fam20C.**

**(A)** Structure of the Fam20A homodimer (PDB ID: 5WRR [<http://dx.doi.org/10.2210/pdb5WRR/pdb>]). One protomer is shown as a ribbon diagram, with the K $\beta$ 3-K $\alpha$ 3 and K $\beta$ 8-K $\alpha$ 6 loops shown as thick ribbons. The other protomer is shown as a surface representation.

**(B)** Structure of the Fam20A-Fam20C heterodimer. Fam20A is shown in cyan, with the K $\beta$ 3-K $\alpha$ 3 and K $\beta$ 8-K $\alpha$ 6 loops shown as thick ribbons. Fam20C is shown in orange.

**(C)** Structural Superposition of Fam20A (gray), Fam20A in the Fam20A-Fam20C complex (cyan), and Fam20C in the Fam20A-Fam20C complex (orange). When engaged with Fam20C, the K $\beta$ 3-K $\alpha$ 3 and K $\beta$ 8-K $\alpha$ 6 loops of Fam20A undergo large conformational changes and become Fam20C-like.

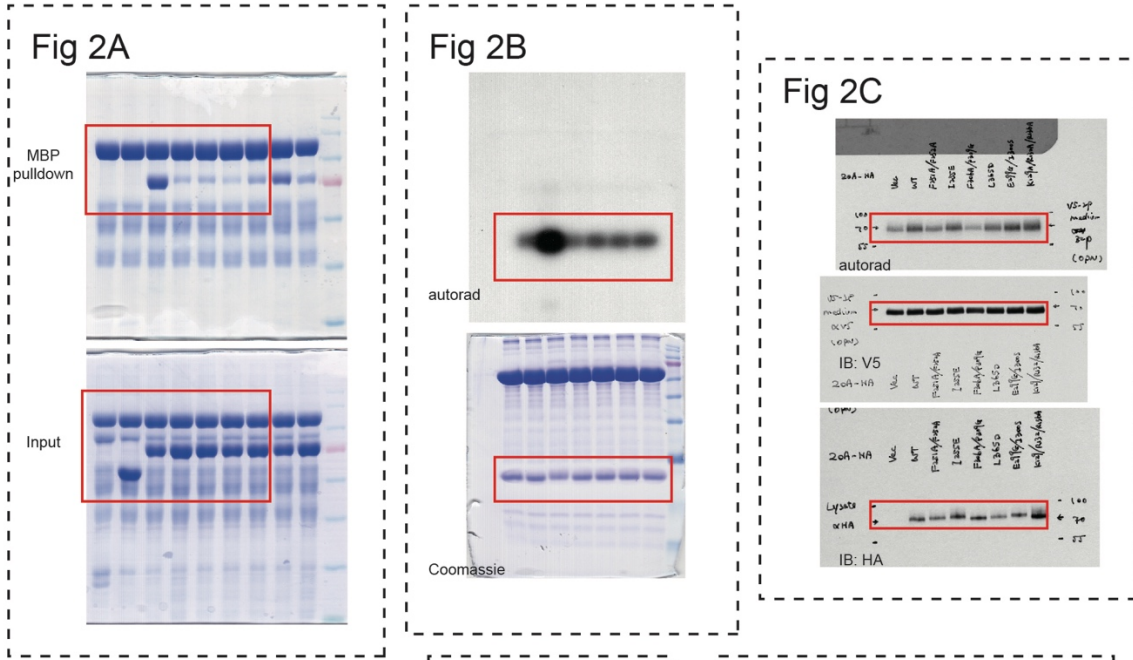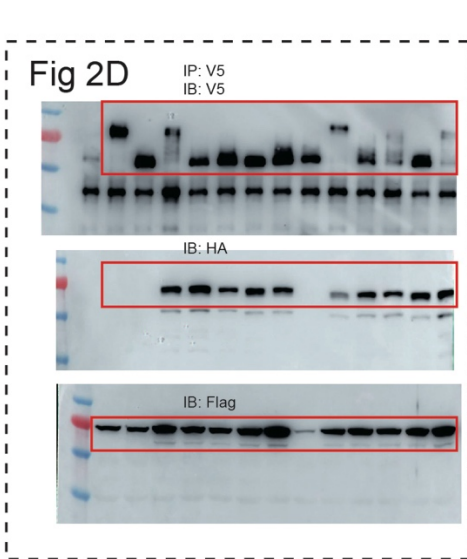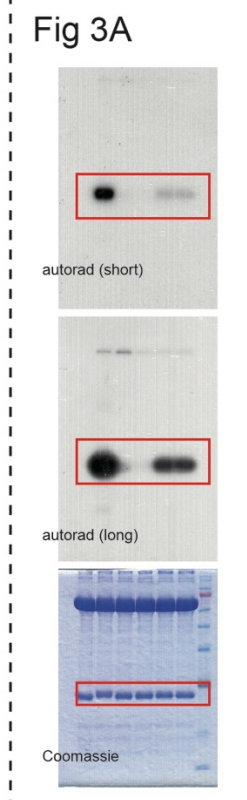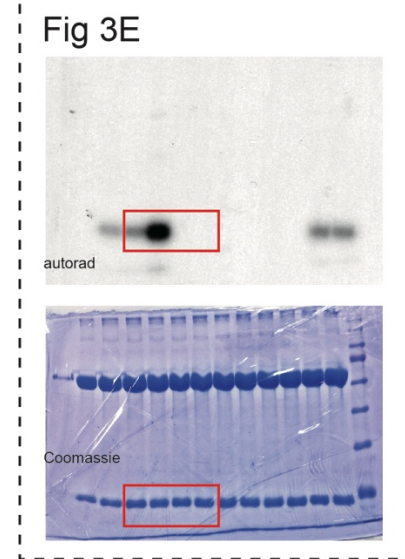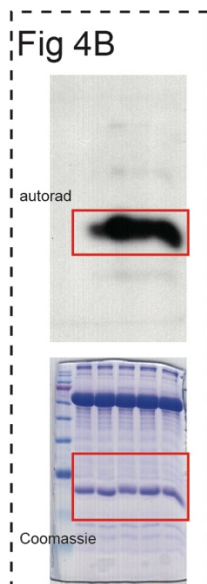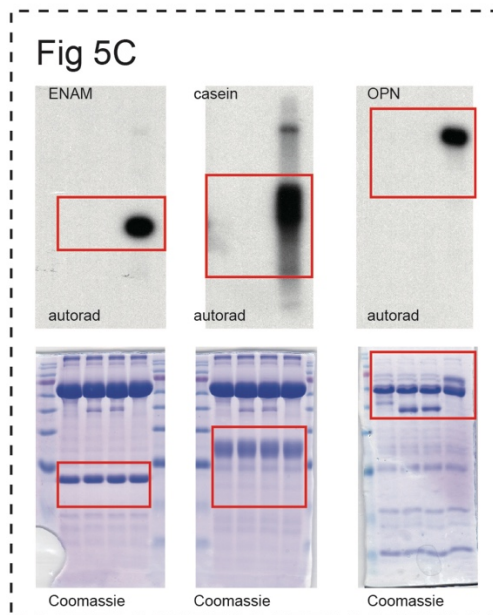

Supplementary Figure 8. Full blots and gels for results presented in the main paper.

**Supplementary Table 1. List of primers used in this study.**

|                                  | Forward                                                 | Reverse                                                 |
|----------------------------------|---------------------------------------------------------|---------------------------------------------------------|
| aqFam20<br>(residues 31-418)     | GCAGATCTGAAGAGCCCACACAGAAC<br>ACAGTC                    | GCCTCGAGCTAAAAGTGTGGCCACTT<br>ATCAAAGAGAACG             |
| hmFam20<br>(residues 55-415)     | GCGGATCCCACAAGCTCAACTCCCCT<br>AATGAG                    | GCCTCGAGTCACAGATGGTCCTCA                                |
| hsFam20B<br>(residues 55-402)    | GCGGATCCAAGCTGGACCATACTTG<br>CAGT                       | GCCTCGAGCTAGTCTTCCACCAGTACT<br>GTGTCCA                  |
| hsFam20C<br>(residues 63-584)    | GCAGATCTGTTTCGGGGCCGCCCGGG                              | GCCTCGAGCTACCTCGCCGAGGCGGC<br>TC                        |
| drFam20C<br>(residues 124-560)   | GCAGATCTCGGCAGAGGCGCACTGAT                              | GCGAATTCTACCTGCCTCCGTGCACT<br>GA                        |
| Fam20A-<br>K129A/R132A/R1<br>36A | TGTACATCTTGTGTGCCCTGTTCCAGG<br>CGGCCACCGCCCTCCGGTAATACC | GGTATTACCGGAGGGCGGTGGCCGCC<br>TGGAACAGGGCACACAAGATGTACA |
| Fam20A-<br>F251A/F252A           | AGACACCAGTGGACGCTGCTTACTTC<br>ATTGACTTTCA               | TGAAAGTCAATGAAGTAAGCAGCGTC<br>CACTGGTGTCT               |
| Fam20A-I255E                     | GACTTCTTCTACTTCGAAGACTTTCAG<br>AGAC                     | GTCTCTGAAAGTCTTCGAAGTAGAAG<br>AAGTC                     |
| Fam20A-<br>E299G/I300S           | GAGGTCACCAAGAATGGATCTCTGCA<br>GAGTGTTTT                 | AAAACACTCTGCAGAGATCCATTCTTG<br>GTGACCTC                 |
| Fam20A-<br>F306A/P309G           | AGAGTGTTTTTCGCTGTCTCTGGAGCGA<br>GCAACGT                 | ACGTTGCTCGCTCCAGAGACAGCGAA<br>AACACTCT                  |
| Fam20A-L365D                     | ATCCGCTCTACACAGACGCAGGAAA<br>AGAGGAG                    | CTCCTCTTTTCTGCGTCTGTGTAGGA<br>GCGGAT                    |
| Fam20C-G280R                     | ACCTTCCAGAATTACCGGCAAGCGCT<br>GTTCAAA                   | TTTGAACAGCGCTTGCCGGTAATTCTG<br>GAAGGT                   |
| Fam20C-<br>F299AF300A            | GAGACACCCCCTGACGCTGCTTATTTT<br>TCTGACTAC                | GTAGTCAGAGAAATAAGCAGCGTCAG<br>GGGGTGTCTC                |
| Fam20C-<br>F354A/P357G           | CTCTGGAGGACCTTCGCCATCTCTGGA<br>GCCAACAACATCTGC          | GCAGATGTTGTTGGCTCCAGAGATGG<br>CGAAGGTCCTCCAGAG          |
| Fam20C-H375Y                     | TACTGCTCCACGGAGTACGCCCTGTGC<br>GGGAAG                   | CTTCCCGCACAGGGCGTACTCCGTGG<br>AGCAGTA                   |
| Fam20C-<br>E374S/H375T           | TACTACTGCTCCACGTCGACCGCCCTG<br>TGCGGGAAG                | CTTCCCGCACAGGGCGGTCGACGTGG<br>AGCAGTAGTA                |
| Fam20C-G379E                     | AGCACGCCCTGTGCGAGAAGCCAGAC<br>CAGAT                     | ATCTGGTCTGGCTTCTCGCACAGGGCG<br>TGCT                     |
| ceFam20-<br>F260A/P263G          | CTCAAGAAGACTTTCGCCTTCTCTGGA<br>GCCAAAAACTTTTGC          | GCAAAAGTTTTTGGCTCCAGAGAAGG<br>CGAAAGTCTTCTTGGAG         |
| Fam20B-T106L                     | TGGGTTATAAAGGGCTACAGCTGAAA<br>GCCTTA                    | TAAGGCTTTCAGCTGTAGCCCTTTATA<br>ACCCA                    |
| Fam20B-Q107A                     | GTTATAAAGGGACAGCGCTGAAAGCC<br>TACTG                     | CAGTAAGGCTTTCAGCGCTGTCCCTTT<br>ATAAC                    |
| Fam20B-G140D                     | GGAACCGTATGCTGATTATGATAGAC<br>ACAATG                    | CATTGTGTCTATCATAATCAGCATAACG<br>GTCC                    |
| Fam20B-Y242F                     | ATGGGGCAGGACTTTCGAGAAGGCA<br>AATTG                      | CAATTTGCCTTCTCGGAAAGTCTGCC<br>CCAT                      |
| Fam20B-D289A                     | GATTGGCAATGCTGCCCCGCCATCACTA<br>TGAG                    | CTCATAGTGATGGCGGGCAGCATTGC<br>CAATC                     |
| Fam20B-H291A                     | GCAATGCTGACCGCGCTCACTATGAG<br>AGCT                      | AGCTCTCATAGTGAGCGCGGTCAGCA<br>TTGC                      |
| Fam20B-K312R                     | TCTTGATAATGCCAGAAGCTTTGGGA<br>ACCC                      | GGGTTCCCAAAGCTTCTGGCATTATCA<br>AGA                      |

**Supplementary Table 2. Codon optimized DNA sequence of hmFam20 (encoding residues 24-415).**

```
TCCAAACTGGAAACAAAGCAGCGGAGCCCCGTGGAGATTATTGACGATGTGAAAGATGAGATTCAGA
AGAGGGAAGCTGATTTACGATGCCCTGCACAAGCTCAACTCCCCTAATGAGGAAAAAGAGTACTTCAA
CATTACGCATGGGACGTGTGGCATGATATGATCTCCGTCAGGGCCCTGACCGTGGACAGCGATGTCG
AAATTTACAAGGTGCTGAAAGCAATGTCCAGCGCCAAGATCACCCAGGCTACCACTGGCTATAAGGG
AACTCAGCTGAAAGCAATGTTCAGCCTCGACGGCCCTCAGATCCAGAACGTGGTCTTCAAGCCAAAG
AGGTACTCTAGAAACAAGATCATCCTGGGTACTCCATACGAGGGCTATGACCGGCACAACGCTGAAA
TCGCCGCTTTCCATCTGGATCGTCTGCTCGGATTTTACCGGGCACCCCCTGTGGTTCGGTCGTTATATTA
ACCTGGCAGCAGAGGTGCTCCCAGTCGCTGCAAAGAACTGGCCACAACCTTCATCAAGGACAAAGA
TGAGAATCTGTGCTTTTACGGAAAGTGCCTCTATTGTAACAGAAAAGAACCCGCCTGTGCTTCAAATG
TGACCATGGAGGGAGCACTCATCCTGTGGCTCCAGAAAAGTGGCCTGTCTGAAACTCCCACACCCC
TGGCGCAGGACATACAACAAGAAAATGGCTAAGTGGGAGACCGACTCACATTACTGCGAGAGTGTGG
TCATTAAGGAACCATATACTAAAGGTCCCAGACTGCTCGACCTGATTGATACATCCATCTTCGACTTT
CTGATCGGCAATGCCGATCGTCACCATTACGAGTATATTGAGAACGAAAATGGCTCTATGGTGATCCA
CCTGGACAACGCTAAGTCATTCGGAATCCCTTTGTGGATGAAAAGAGCATTCTGTCTCCTCTCGTCC
AGTGCTGTCGGCTGCGCTCTTCAACTTACAACCGCCTCAAGATCGCTACAAGCAACGAGAATAGTCTG
TCCGTGCTGCTCGACAAGAGGCTCAGTATCGATCCTATTTACCCAATCCTGACCTCCGACCATCTGCTC
GCCCTGGATAGACGTCTGCTCCTGGTGCAGGACGCTGTGGAGAAGTGCTTTAAGGAGAAAAACAAGG
AGAATGTGATTATTGAGGACCATCTGTGA
```
